# Supplementary material
Source: publisher figshare collection journal article supplement (https://frontiersin.figshare.com/ndownloader/files/13466678)
Supplement: Supplementary file [file 13466678]

**Supplementary material for Majzoub *et al*:**

**Causes and consequences of a variant strain of *Phaeobacter inhibens* with reduced competition**

Marwan Majzoub<sup>1</sup>, Kerensa McElroy<sup>2</sup>, Michael Maczka<sup>3</sup>, Torsten Thomas<sup>4</sup> and Suhelen Egan<sup>4#</sup>

<sup>1</sup> Centre for Marine Bio-Innovation and School of Biotechnology and Biomolecular Sciences, The University of New South Wales, Sydney, New South Wales, Australia

<sup>2</sup> Agriculture and Food, Commonwealth Scientific and Industrial Research Organisation (CSIRO), Canberra, Australia

<sup>3</sup> Institute of Organic Chemistry, TU Braunschweig, Braunschweig, Germany

<sup>4</sup> Centre for Marine Bio-Innovation and School of Biological, Earth and Environmental Sciences, The University of New South Wales, Sydney, New South Wales, Australia

<sup>#</sup>Corresponding author

Assoc. Prof. Suhelen Egan

Centre for Marine Bio-Innovation

School of Biological, Earth and Environmental Sciences

The University of New South Wales, NSW 2052, Australia

Ph + 61 (0) 2 938 53467

Email: [s.egan@unsw.edu.au](mailto:s.egan@unsw.edu.au)

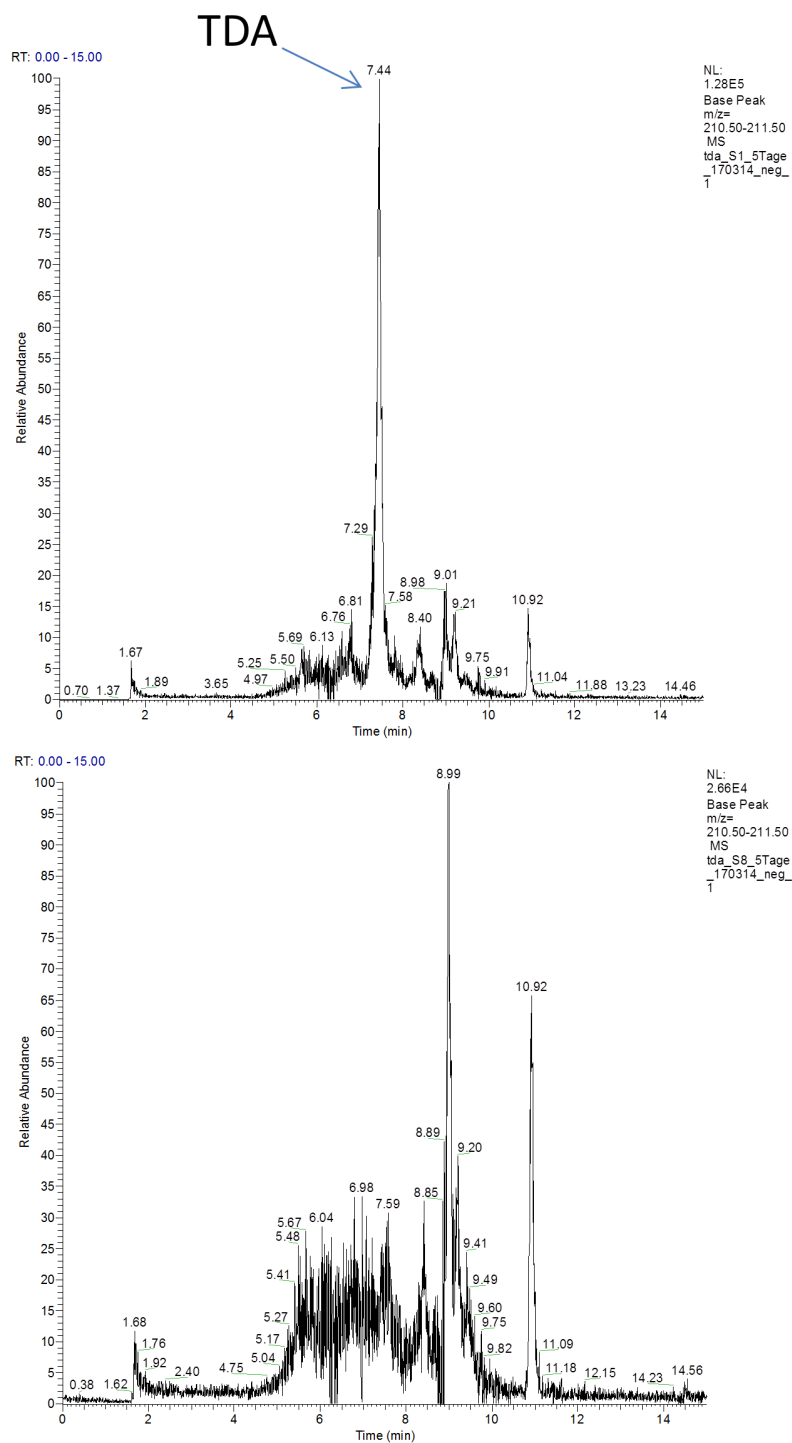

**Figure S1:** HPLC chromatogram of TDA obtained from *P. inhibens* 2.10 parental WT (a) and *P. inhibens* variant NCV12a1 (b) ethyl acetate extracts. The dominant peak at 7.44 mins corresponds to TDA (Bruhn et al., 2005).

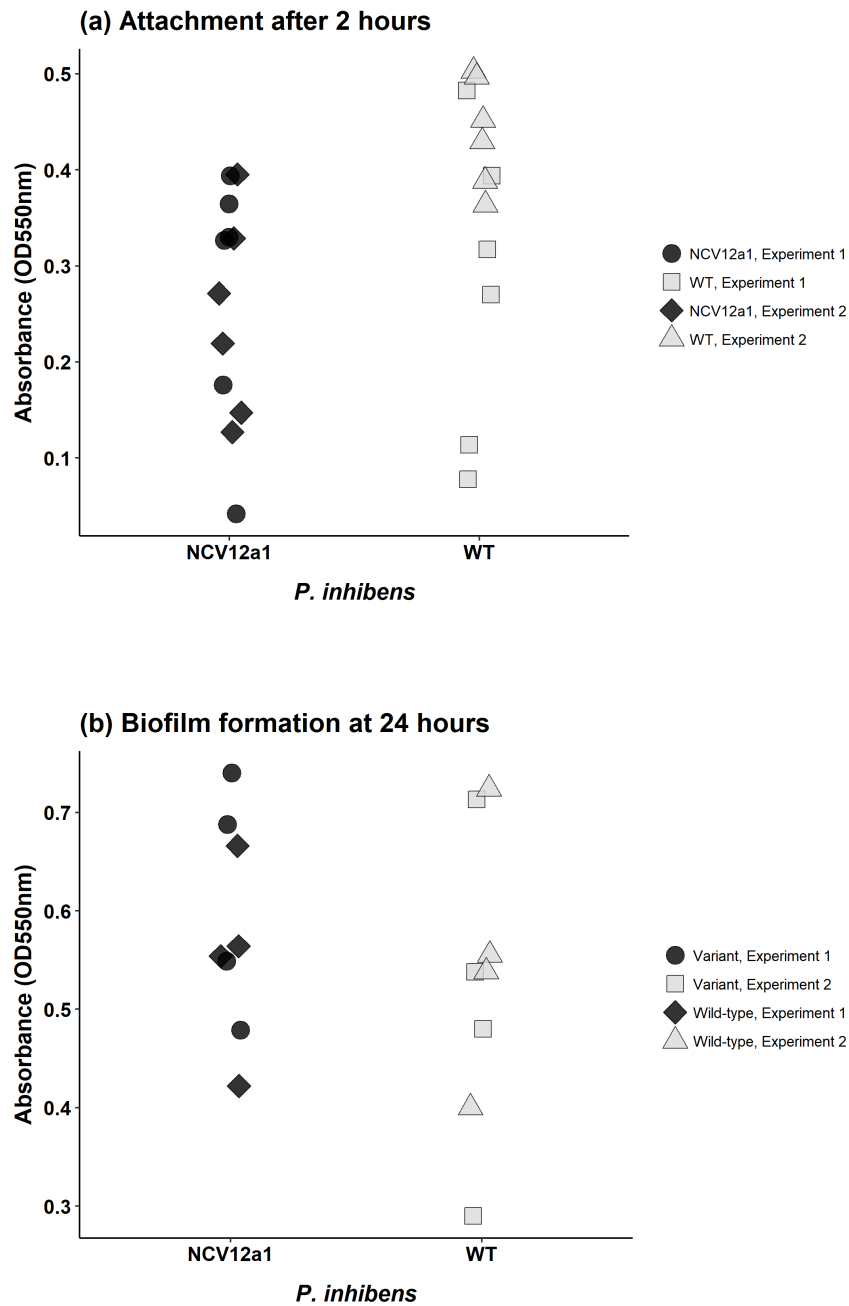

**Figure S2:** Surface attachment (a) and biofilm formation (b) by *P. inhibens* 2.10 WT and variant NCV12a1. Plotted points indicate replicate measures ((a)  $n=12$ , (b)  $n=8$ ) for each individual experiment. The experiments for *P. inhibens* WT and NCV12a1 are independent. No significant differences were observed between *P. inhibens* WT and NCV12a1 ( $p > 0.05$ ).

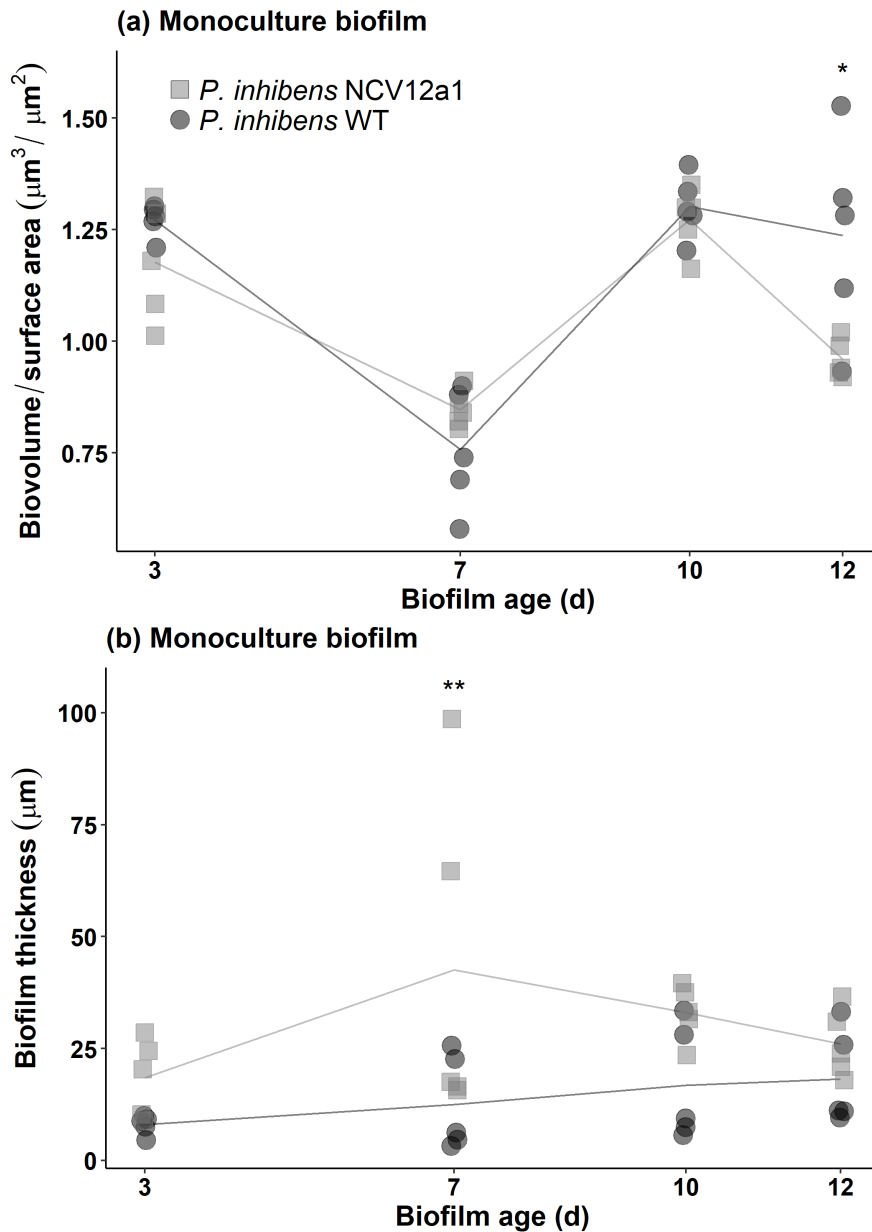

**Figure S3:** Time-series of *P. inhibens* 2.10 WT (circle symbol) and NCV12a1 (square symbol) monoculture biofilm development in continuous flow cell system reported as biovolume over surface area ( $\mu\text{m}^3/\mu\text{m}^2$ ) (a), and thickness ( $\mu\text{m}$ ) (b). Biofilms were observed on 3, 7, 10 and 12 d. Plotted points indicate replicate measures ( $n=5$ ) for each individual experiment. Lines represent the mean for each experiment. Statistical analysis was performed using two-way ANOVA. Significant differences for figure (a) was observed after 12 d of biofilm growth ( $p = 0.0337$ ; \*). Statistical differences for figure (b) was observed after 7 d of biofilm growth ( $p = 0.0084$ ; \*\*).

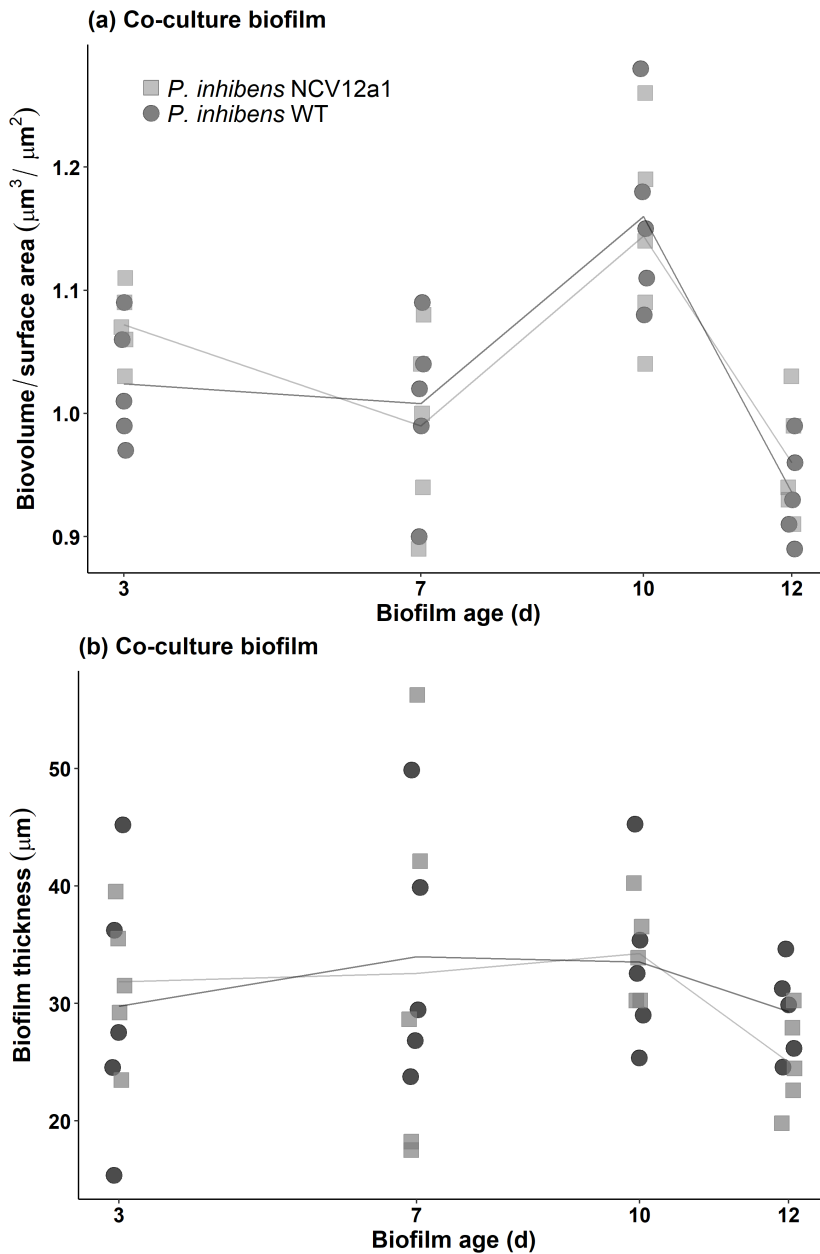

**Figure S4:** Time-series biofilm development showing the proportion of *P. inhibens* 2.10 WT (circle symbol) and NCV12a1 (square symbol) when grown as mixed-species biofilms in continuous flow cell system. Biofilms are reported as biovolume over surface area ( $\mu\text{m}^3 / \mu\text{m}^2$ ) (a) and thickness ( $\mu\text{m}$ ) (b). The established biofilms were observed on 3, 7, 10 and 12 d. Plotted points indicate replicate measures (n=5) for each individual experiment. Lines represent the mean for each experiment. No significant differences were observed at each time point.

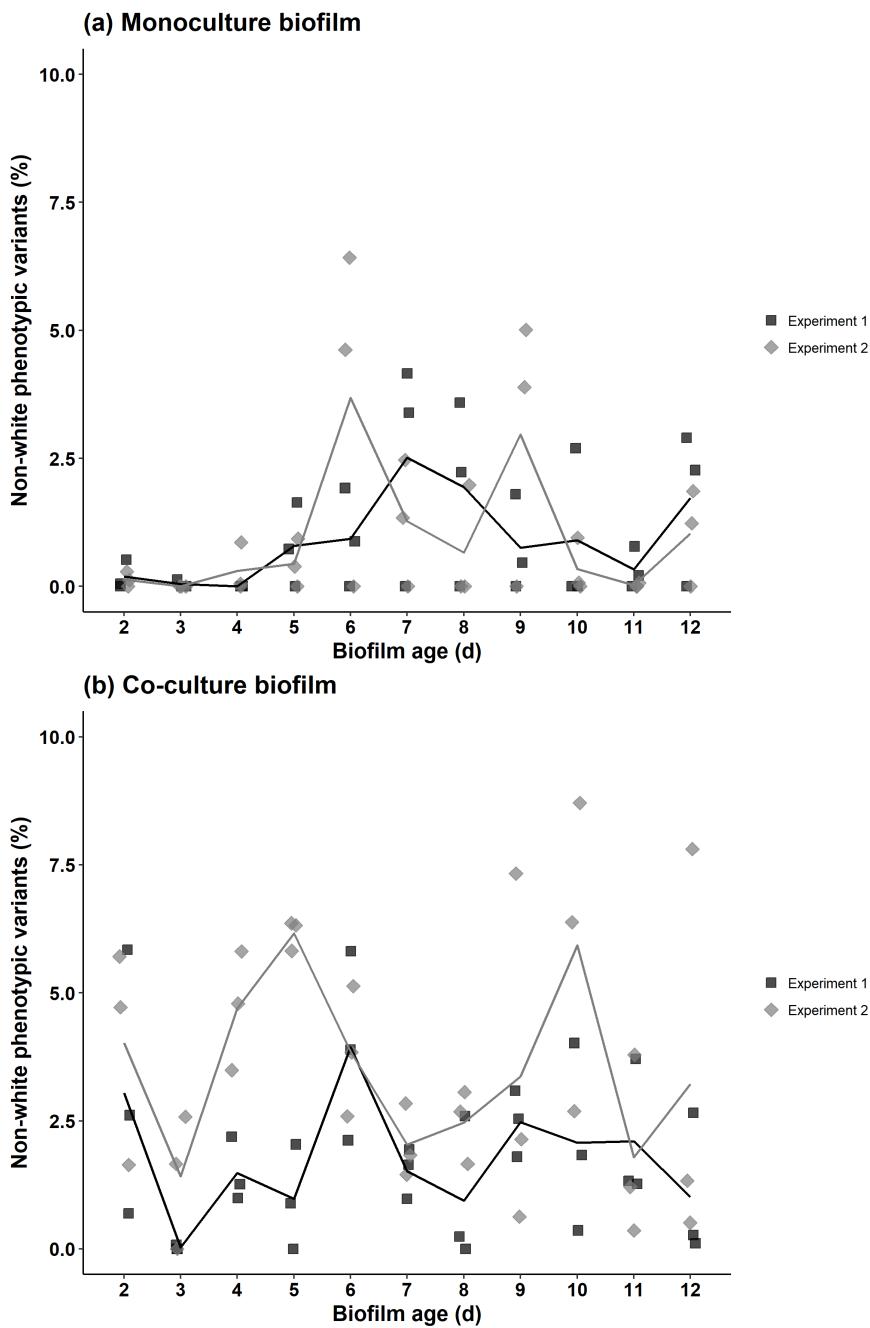

**Figure S5:** Phenotypic variation of *P. inhibens* NCV12a1 monoculture biofilm (a) and co-culture biofilm with *P. tunicata* (b) colonies over a period of 12 d within a continuous biofilm flow cell system. Viable effluent cells were collected each day for 12 d. Plotted points indicate the percentage (n=6) of *P. inhibens* variant NCV12a1 ‘other’ colony variants obtained at each day of biofilm growth. Lines represent the mean for each experiment.

**Table S1:** Mutations detected in *P. inhibens* 2.10 WT parental genome compared to *P. inhibens* 2.10 reference genome. The column “Replicon” refers to whether the mutation was detected in the chromosome or the plasmids. The column “Position” refers to the position relative to the start of the replicon. The columns “Gene” and “Function” refer to the name and the predicted function of the homologous gene in the *P. inhibens* reference genome. Clusters of Orthologous Groups (COGs) functional categories: M: Cell wall/membrane/envelope biogenesis; L: Replication, recombination and repair; P: Inorganic ion transport and metabolism; R: General function prediction only; C: Energy production and conversion; D: Cell cycle control/cell division/chromosome partitioning; N: Cell motility; T: Signal transduction mechanisms; S: Function unknown; O: Post-translational modification, protein turnover chaperones. The column designated “Variant” refers to the original nucleotide and the nucleotide mutation that was detected. SNPs, deletions (del), duplications (dup) or insertions (ins) are given relative to the start of the gene (c). The column designated “Effect” indicates the amino acid level changes that occur as a result of the variant mutation. NA, not applicable; PUF, protein unknown function. # changes codon usage, possibly increasing translation.

| Locus tag                            | Replicon   | Position | Annotation         | Gene            | Predicted<br>Product/Function<br>[COG]                       | Variant    | Effect      |
|--------------------------------------|------------|----------|--------------------|-----------------|--------------------------------------------------------------|------------|-------------|
| TDA production                       |            |          |                    |                 |                                                              |            |             |
| PGA2_c15540                          | Chromosome | 1713355  | frameshift_variant | <i>paaZ2</i>    | Enoyl-CoA<br>hydratase family<br>protein [C]                 | c.43delC   | p.Gln15fs   |
| DNA replication and repair           |            |          |                    |                 |                                                              |            |             |
| PGA2_c00030                          | Chromosome | 4075     | missense_variant   | <i>recF</i>     | DNA replication<br>and repair protein<br>[L]                 | c.1019C>T  | p.Pro340Leu |
| PGA2_c00030                          | Chromosome | 4088     | missense_variant   | <i>recF</i>     | DNA replication<br>and repair protein<br>[L]                 | c.1032A>T  | p.Leu344Phe |
| PGA2_c11620                          | Chromosome | 1279598  | frameshift_variant | PGA2_<br>c11620 | Resolvase [L]                                                | c.1322delT | p.Phe441fs  |
| PGA2_c28190                          | Chromosome | 3101863  | frameshift_variant | PGA2_<br>c28190 | Conserved DNA<br>binding protein,<br>YbaB/EbfC family<br>[R] | c.282dupG  | p.Lys95fs   |
| Chemotaxis, transport and metabolism |            |          |                    |                 |                                                              |            |             |
| PGA2_c14010                          | Chromosome | 1545069  | frameshift_variant |                 | Methyl-accepting<br>chemotaxis protein<br>(nitrate/nitrite   | c.18delT   | p.Phe6fs    |

|                |            |         |                       |              |                                                                       |             |             |
|----------------|------------|---------|-----------------------|--------------|-----------------------------------------------------------------------|-------------|-------------|
|                |            |         |                       |              | sensing) [N] [T]                                                      |             |             |
| PGA2_c14720    | Chromosome | 1625957 | frameshift_variant    | <i>trkA</i>  | Trk system<br>potassium uptake<br>protein [P]                         | c.1356insG  | p.Ser453fs  |
| PGA2_c14720    | Chromosome | 1626128 | frameshift_variant    | <i>trkA</i>  | Trk system<br>potassium uptake<br>protein [P]                         | c.1533insT  | p.Thr512fs  |
| PGA2_c00120    | Chromosome | 13457   | missense_variant      | <i>gabDI</i> | Succinate-<br>semialdehyde<br>dehydrogenase [C]                       | c.352G>T    | p.Gly118Trp |
| EPS production |            |         |                       |              |                                                                       |             |             |
| PGA2_71p310    | pPGA2_71   | 45578   | synonymous_variant    | <i>gmd</i>   | GDP-mannose 4,6-<br>dehydratase [M]                                   | c.1072C>T   | p.Leu358Leu |
| PGA2_71p310    | pPGA2_71   | 45678   | synonymous_variant    | # <i>gmd</i> | GDP-mannose 4,6-<br>dehydratase [M]                                   | c.972C>A    | p.Thr324Thr |
| PGA2_71p310    | pPGA2_71   | 45687   | synonymous_variant    | # <i>gmd</i> | GDP-mannose 4,6-<br>dehydratase [M]                                   | c.963A>G    | p.Gly321Gly |
| PGA2_c09570    | Chromosome | 1051860 | synonymous_variant    | <i>ftsA</i>  | Cell division<br>protein [D]                                          | c.594A>G    | p.Gln198Gln |
| Other          |            |         |                       |              |                                                                       |             |             |
| PGA2_c02240    | Chromosome | 254279  | frameshift_variant    |              | Glyoxylase, beta-<br>lactamase<br>superfamily II- like<br>protein [R] | c.129dupT   | p.Leu44fs   |
| PGA2_239p1450  | pPGA2_239  | 159947  | upstream_gene_variant |              | Hypothetical<br>protein [O]                                           | c.-1delC    | Unknown     |
| PGA2_239p1120  | pPGA2_239  | 124122  | frameshift_variant    |              | Hypothetical<br>protein [S]                                           | c.2506dupG  | p.Glu836fs  |
| PGA2_239p1120  | pPGA2_239  | 124163  | frameshift_variant    |              | Hypothetical<br>protein [S]                                           | c.2465dupA  | p.Asp822fs  |
| PGA2_239p1130  | pPGA2_239  | 128236  | missense_variant      |              | Hypothetical<br>protein [S]                                           | c.806C>T    | p.Thr269Met |
| PGA2_95p160    | pPGA2_95   | 24139   | upstream_gene_variant |              | PUF [S]                                                               | c.-1_-1insA | Unknown     |
| PGA2_95p160    | pPGA2_95   | 24150   | upstream_gene_variant |              | PUF [S]                                                               | c.-1_-1insT | Unknown     |
| PGA2_95p710    | pPGA2_95   | 94382   | upstream_gene_variant |              | Putative plasmid<br>partition protein A<br>[N]                        | c.-1_-1insT | Unknown     |
